# Supplementary material for: Effect of Brown Algae and Lichen Extracts on the SCOBY Microbiome and Kombucha Properties
Source: MDPI journal article supplement (doi:10.3390/foods12010047), 2022-12-22
Supplement: s1 [file s1]

## Supplementary Materials:

Table S1. Chemical composition of extracts of green tea, algae *Fucus vesiculosus* and lichen *Cetraria islandica*, mg/g dry matter.

|                            | Green tea | <i>Fucus vesiculosus</i> | <i>Cetraria islandica</i> |
|----------------------------|-----------|--------------------------|---------------------------|
| <b>Carbohydrates</b>       |           |                          |                           |
| Fructose                   | 8.88      | 0.37                     | 1.70                      |
| Glucose                    | 7.99      | 0.59                     | 18.41                     |
| Maltose                    | 0.24      | 0.00                     | 0.00                      |
| Mannose                    | 1.74      | 0.51                     | 0.00                      |
| Raffinose                  | 3.07      | 0.00                     | 0.00                      |
|                            |           |                          |                           |
| <b>Organic acids</b>       |           |                          |                           |
| Acetic                     | 9.55      | 8.34                     | 11.61                     |
| Citric                     | 0.00      | 0.97                     | 2.41                      |
| Fumaric                    | 0.00      | 0.00                     | 0.13                      |
| Isocitric                  | 0.00      | 0.00                     | 1.14                      |
| $\alpha$ -Ketoglutaric     | 0.00      | 0.00                     | 1.46                      |
| Quinic                     | 27.85     | 0.00                     | 0.00                      |
| Isovaleric                 | 0.39      | 0.00                     | 0.00                      |
| Caprylic                   | 0.21      | 0.00                     | 0.00                      |
| Gluconic                   | 0.28      | 0.00                     | 0.00                      |
| Glucuronic                 | 0.13      | 0.00                     | 0.00                      |
|                            |           |                          |                           |
| <b>Amino acids</b>         |           |                          |                           |
| Alanine                    | 0.00      | 0.52                     | 0.00                      |
| Glutamic acid              | 0.00      | 2.47                     | 0.00                      |
| Glycine                    | 0.00      | 0.00                     | 0.14                      |
|                            |           |                          |                           |
| <b>Phenolic acids</b>      |           |                          |                           |
| 3-Hydroxyphenylacetic acid | 0.27      | 0.00                     | 0.25                      |
| 4-Coumaric acid            | 0.00      | 0.00                     | 18.88                     |
| Ferulic acid               | 0.00      | 0.00                     | 0.62                      |
| Chlorogenic acid           | 0.16      | 0.00                     | 0.00                      |
| Gallic acid                | 1.75      | 0.00                     | 0.00                      |
|                            |           |                          |                           |
| <b>Polyols</b>             |           |                          |                           |
| Glycerol                   | 0.10      | 0.36                     | 0.53                      |
| Mannitol                   | 0.37      | 0.00                     | 0.00                      |
| Myo-inositol               | 4.02      | 0.00                     | 0.00                      |
|                            |           |                          |                           |
| <b>Fatty alcohols</b>      |           |                          |                           |
| Hexadecanol                | 0.14      | 0.00                     | 0.00                      |
| Fitol                      | 0.12      | 0.00                     | 0.00                      |
|                            |           |                          |                           |
| <b>Flavonoids</b>          |           |                          |                           |
| Catechin                   | 2.24      | 0.00                     | 0.00                      |

Table S2. Chemical composition of kombucha samples, mg/g dry matter.

|                             | Kombucha sample  |       |        |       |        |       |        |       |
|-----------------------------|------------------|-------|--------|-------|--------|-------|--------|-------|
|                             | K                |       | KF     |       | KC     |       | KFC    |       |
|                             | Fermentation day |       |        |       |        |       |        |       |
|                             | 0                | 12    | 0      | 12    | 0      | 12    | 0      | 12    |
| Carbohydrates               |                  |       |        |       |        |       |        |       |
| Fructose                    | 0.54             | 54.18 | 0.60   | 5.68  | 0.56   | 49.40 | 0.58   | 7.02  |
| Glucose                     | 0.69             | 24.50 | 0.89   | 2.84  | 0.84   | 23.54 | 0.83   | 5.23  |
| Mannose                     | 0.00             | 0.00  | 0.00   | 0.00  | 0.00   | 0.00  | 0.00   | 1.73  |
| Raffinose                   | 1.03             | 1.39  | 1.03   | 1.31  | 1.03   | 1.22  | 1.02   | 1.15  |
| Sucrose                     | 943.40           | 883.1 | 960.24 | 926.0 | 967.37 | 831.7 | 941.28 | 863.7 |
|                             |                  |       |        |       |        |       |        |       |
| Organic acids               |                  |       |        |       |        |       |        |       |
| Acetic                      | 3.91             | 4.44  | 3.81   | 8.94  | 3.65   | 5.12  | 4.09   | 6.68  |
| Citric                      | 0.00             | 0.00  | 0.00   | 0.56  | 0.00   | 0.00  | 0.00   | 0.00  |
| Formic                      | 0.00             | 0.00  | 0.00   | 1.21  | 0.00   | 2.14  | 0.00   | 0.00  |
| Isocitric                   | 0.00             | 0.00  | 1.43   | 0.00  | 0.89   | 0.00  | 0.00   | 0.00  |
| Gluconic                    | 0.00             | 1.28  | 0.00   | 1.85  | 0.00   | 1.38  | 0.00   | 1.92  |
| Pyruvic                     | 0.00             | 3.65  | 0.00   | 0.00  | 0.00   | 0.00  | 0.00   | 0.00  |
| Quinic                      | 1.75             | 0.67  | 1.91   | 0.00  | 1.84   | 1.10  | 1.94   | 0.00  |
| Isovaleric                  | 0.08             | 0.00  | 0.09   | 0.00  | 0.09   | 0.00  | 0.10   | 0.00  |
| Caprylic                    | 0.08             | 0.00  | 0.06   | 0.00  | 0.06   | 0.00  | 0.07   | 0.00  |
| Propionic                   | 0.00             | 0.00  | 0.01   | 0.00  | 0.00   | 0.00  | 0.04   | 0.00  |
| Orotic                      | 0.00             | 0.48  | 0.00   | 1.08  | 0.00   | 0.23  | 0.00   | 0.88  |
|                             |                  |       |        |       |        |       |        |       |
| Amino acids                 |                  |       |        |       |        |       |        |       |
| Alanine                     | 0.00             | 0.40  | 0.00   | 0.00  | 0.00   | 0.38  | 0.00   | 0.00  |
| Glycine                     | 0.00             | 0.20  | 0.00   | 0.24  | 0.00   | 0.15  | 0.00   | 0.00  |
| Lysine                      | 0.00             | 0.00  | 0.00   | 0.00  | 0.56   | 0.00  | 1.22   | 0.00  |
|                             |                  |       |        |       |        |       |        |       |
| Phenolic acids              |                  |       |        |       |        |       |        |       |
| 3-Hydroxy-phenylacetic acid | 0.00             | 0.00  | 0.00   | 0.00  | 0.00   | 0.00  | 0.05   | 0.00  |
| 4-Coumaric acid             | 0.00             | 0.09  | 0.00   | 1.50  | 0.00   | 0.00  | 0.00   | 1.61  |
| Ferulic acid                | 0.00             | 0.22  | 0.00   | 0.00  | 0.00   | 0.24  | 0.00   | 0.26  |
|                             |                  |       |        |       |        |       |        |       |
| Polyols                     |                  |       |        |       |        |       |        |       |
| Glycerol                    | 0.22             | 0.58  | 0.00   | 1.34  | 0.00   | 0.47  | 0.00   | 1.23  |
| Mannitol                    | 0.00             | 0.00  | 0.57   | 0.00  | 0.00   | 0.00  | 0.50   | 0.00  |
| Myo-inositol                | 0.27             | 0.00  | 0.30   | 0.00  | 0.29   | 0.00  | 0.31   | 0.00  |
